# Supplementary material
Source: ML conference proceedings conference paper supplement (https://proceedings.neurips.cc/paper_files/paper/2019/hash/dc6a70712a252123c40d2adba6a11d84-Abstract.html)

55

50

45

40

35

0.025

0.050

0.075

0.100

0.125

0.150

0.175

0.200

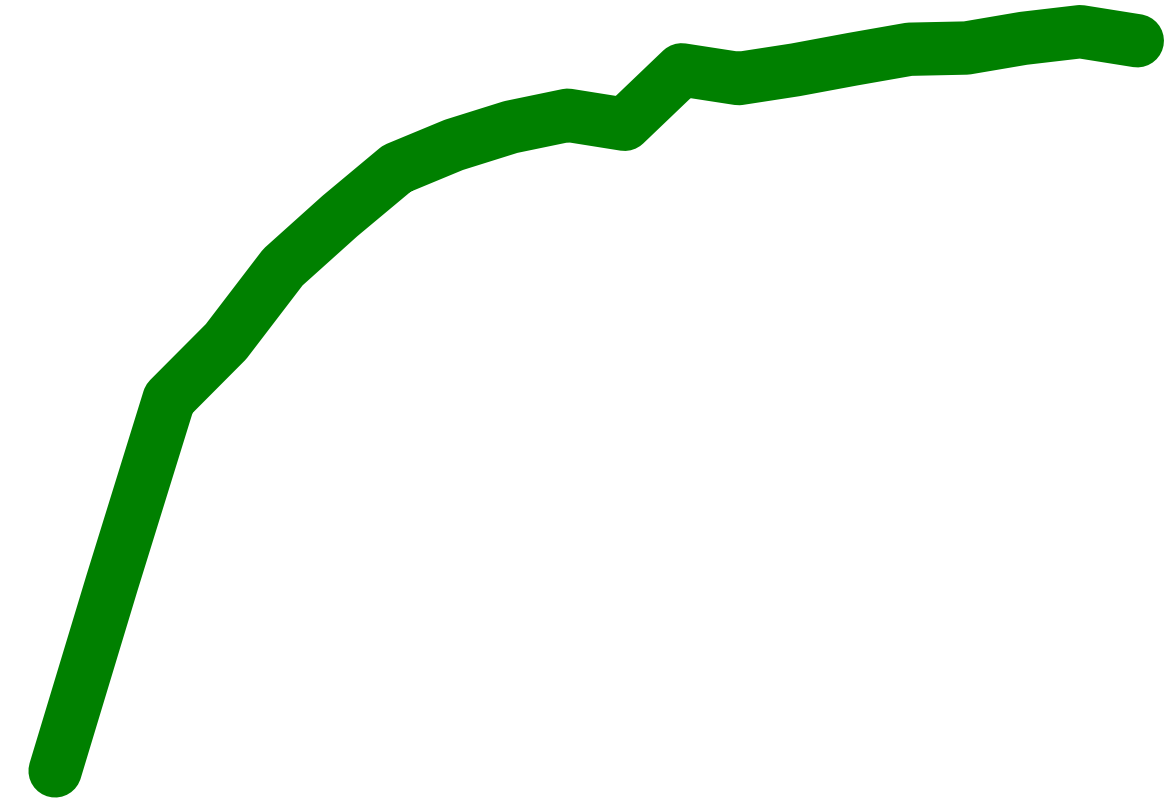

Supplement: Supplementary file [file dc6a70712a252123c40d2adba6a11d84-Supplemental.zip]
